# Supplementary material
Source: HighWire-hosted journal article supplement (http://dmd.aspetjournals.org/highwire/filestream/66253/field_highwire_adjunct_files/4/DMD_51391supplemental-table-3.pdf)
Supplement: DMD_51391supplemental-table-3.pdf [file DMD_51391supplemental-table-3.pdf]

## Combinatorial Metabolism Notably Affects Human Systemic Exposure to Ginsenosides from Orally Administered Extract of *Panax notoginseng* Roots (Sanqi)

Zheyi Hu, Junling Yang, Chen Cheng, Yuhong Huang, Feifei Du, Fengqing Wang, Wei Niu, Fang Xu, Rongrong Jiang, Xiumei Gao, Chuan Li

### Drug Metabolism and Disposition

### Supplemental Table 3

Human plasma pharmacokinetics and urinary excretion data of ginsenosides and their major metabolites after a single p.o. dose of Sanqi-extract at 90 ml/subject

| Compound*                                      | Sex    | $C_{\max}$ (nM) | $T_{\max}$ (h) | $T_L$ (h)   | $AUC_{0-t}$ (nM·h) | MRT (h)     | $Cum.A_{e-0-72h}$ (nmol) | $CL_R$ (l/h)  |
|------------------------------------------------|--------|-----------------|----------------|-------------|--------------------|-------------|--------------------------|---------------|
| <i>Ppd-type ginsenosides and the sapogenin</i> |        |                 |                |             |                    |             |                          |               |
| Ginsenoside Ra <sub>3</sub> (P/U-g)            | Male   | 0.65 ± 0.16     | 20.1 ± 16.4    | 1.63 ± 1.03 | 19.4 ± 3.1         | 46.1 ± 8.4  | 1.76 ± 0.19              | 0.089 ± 0.020 |
|                                                | Female | 0.61 ± 0.23     | 14.0 ± 6.9     | 1.00 ± 0.58 | 16.7 ± 8.0         | 47.8 ± 20.9 | 1.27 ± 0.59              | 0.090 ± 0.048 |
| Ginsenoside Rb <sub>1</sub> (P/U-g)            | Male   | 8.35 ± 2.10     | 8.50 ± 4.93    | 0.50 ± 0    | 336 ± 109          | 49.2 ± 6.9  | 19.4 ± 5.2               | 0.066 ± 0.017 |
|                                                | Female | 6.17 ± 2.36     | 5.75 ± 5.17    | 0.50 ± 0    | 117 ± 61           | 53.2 ± 7.5  | 13.1 ± 5.5               | 0.070 ± 0.025 |
| Ginsenoside Rd (P/U-g)                         | Male   | 1.81 ± 0.46     | 11.8 ± 2.9     | 0.75 ± 0.50 | 59.2 ± 26.3        | 41.5 ± 15.2 | 1.57 ± 0.39              | 0.031 ± 0.014 |
|                                                | Female | 2.33 ± 1.18     | 10.8 ± 3.4     | 0.50 ± 0    | 61.8 ± 40.6        | 31.1 ± 7.5  | 1.55 ± 0.41              | 0.032 ± 0.018 |
| Ginsenoside F <sub>2</sub> (P/U-g)             | Male   | 0.78 ± 0.18     | 14.3 ± 1.5     | 10.1 ± 3.8  | 12.4 ± 5.2         | 32.4 ± 5.5  | 0.179 ± 0.127            | 0.013 ± 0.009 |
|                                                | Female | 0.83 ± 0.28     | 12.8 ± 1.5     | 4.50 ± 0    | 12.1 ± 3.7         | 21.6 ± 2.3  | 0.224 ± 0.116            | 0.017 ± 0.008 |
| Compound-K (P/U-m)                             | Male   | 90.1 ± 14.6     | 15.0 ± 0       | 0.50 ± 0    | 1514 ± 469         | 24.0 ± 3.0  | 29.6 ± 8.3               | 0.020 ± 0.007 |
|                                                | Female | 152 ± 67        | 11.8 ± 2.9     | 0.50 ± 0    | 2183 ± 839         | 18.5 ± 4.3  | 39.2 ± 12.9              | 0.018 ± 0.002 |
| 20(S)-Protopanaxadiol (P-m)                    | Female | 5.77            | 27.0           | 19.5        | 161                | 88.3        | –                        | –             |
| 20(S)-Protopanaxadiol (P-m)                    | Female | 8.18 ± 5.28     | 21.0 ± 10.4    | 13.5 ± 11.0 | 181 ± 34           | 27.0 ± 7.7  | –                        | –             |
| <i>Ppt-type ginsenosides and the sapogenin</i> |        |                 |                |             |                    |             |                          |               |
| Notoginsenoside R <sub>1</sub> (P/U-g)         | Male   | 0.33 ± 0.14     | 6.25 ± 4.91    | 0.50 ± 0    | 1.02 ± 0.55        | 6.67 ± 3.52 | 23.8 ± 7.4               | 22.2 ± 16.5   |
|                                                | Female | 0.30 ± 0.10     | 1.00 ± 0.58    | 0.75 ± 0.50 | 0.97 ± 0.86        | 11.4 ± 9.6  | 20.2 ± 4.3               | 30.0 ± 19.6   |
| Ginsenoside Rg <sub>1</sub> (P/U-g)            | Male   | 1.83 ± 0.86     | 2.88 ± 3.45    | 0.50 ± 0    | 11.1 ± 5.2         | 9.35 ± 2.94 | 158 ± 67                 | 10.7 ± 3.7    |
|                                                | Female | 1.99 ± 0.58     | 0.75 ± 0.50    | 0.50 ± 0    | 10.3 ± 2.9         | 6.86 ± 2.02 | 130 ± 31                 | 11.2 ± 1.9    |
| Ginsenoside F <sub>1</sub> (P/U-g)             | Male   | 1.50 ± 1.06     | 16.5 ± 5.2     | 7.13 ± 4.80 | 18.3 ± 6.3         | 31.6 ± 14.0 | 9.27 ± 3.23              | 0.449 ± 0.139 |
|                                                | Female | 1.57 ± 0.74     | 16.4 ± 9.6     | 1.13 ± 1.25 | 12.3 ± 6.0         | 13.0 ± 6.1  | 10.2 ± 6.0               | 0.661 ± 0.257 |
| 20(S)-Protopanaxatiol (P-m)                    | Male   | 57.3 ± 51.4     | 33.5 ± 11.7    | 3.13 ± 1.89 | 1142 ± 899         | 38.8 ± 6.2  | –                        | –             |
|                                                | Female | 57.0 ± 23.5     | 26.0 ± 11.0    | 2.13 ± 1.97 | 1064 ± 481         | 32.0 ± 15.9 | –                        | –             |
| <i>Metabolites of 20(S)-protopanaxadiol</i>    |        |                 |                |             |                    |             |                          |               |
| <b>M16</b> (P/U-m)                             | Male   | 4.92 ± 5.16     | 25.3 ± 9.5     | 10.0 ± 2.3  | 106 ± 75           | 32.0 ± 4.8  | 2.35 ± 1.37              | 0.023 ± 0.012 |
|                                                | Female | 5.65 ± 2.27     | 25.3 ± 9.5     | 7.25 ± 3.57 | 135 ± 92           | 33.2 ± 8.3  | 2.38 ± 0.77              | 0.020 ± 0.007 |

## DMD #51391

|                                              |        |             |             |             |               |             |             |               |
|----------------------------------------------|--------|-------------|-------------|-------------|---------------|-------------|-------------|---------------|
| <b>M17</b> (P-m)                             | Male   | 13.5 ± 10.0 | 32.5 ± 6.8  | 11.0 ± 2.0  | 336 ± 230     | 51.6 ± 14.9 | –           | –             |
|                                              | Female | 18.1 ± 8.8  | 35.0 ± 14.3 | 6.25 ± 2.02 | 477 ± 262     | 36.6 ± 2.6  | –           | –             |
| <b>M19</b> (P-m)                             | Male   | 13.1 ± 8.9  | 37.0 ± 13.9 | 12.8 ± 1.5  | 382 ± 255     | 48.1 ± 10.8 | –           | –             |
|                                              | Female | 21.8 ± 8.0  | 35.0 ± 14.3 | 9.00 ± 2.00 | 593 ± 283     | 34.6 ± 3.4  | –           | –             |
| <b>M20</b> (P-m)                             | Male   | 7.05 ± 4.48 | 27.5 ± 7.0  | 13.5 ± 1.7  | 184 ± 125     | 39.1 ± 5.3  | –           | –             |
|                                              | Female | 11.9 ± 6.0  | 30.5 ± 18.6 | 9.00 ± 2.00 | 260 ± 134     | 27.9 ± 5.1  | –           | –             |
| <b>M21</b> (P-m)                             | Male   | 28.8 ± 19.7 | 32.0 ± 16.0 | 11.0 ± 2.0  | 846 ± 519     | 48.7 ± 12.2 | –           | –             |
|                                              | Female | 48.2 ± 19.1 | 30.5 ± 18.6 | 6.30 ± 2.00 | 1273 ± 593    | 34.0 ± 7.1  | –           | –             |
| <b>M22</b> (P-m)                             | Male   | 5.18 ± 3.38 | 29.0 ± 6.6  | 17.3 ± 4.5  | 144 ± 95      | 47.0 ± 16.5 | –           | –             |
|                                              | Female | 10.8 ± 4.8  | 24.8 ± 7.1  | 12.0 ± 8.0  | 230 ± 102     | 30.2 ± 7.8  | –           | –             |
| <b>M34</b> (U-m)                             | Male   | –           | –           | –           | –             | –           | 32.8 ± 20.8 | 1.73 ± 1.10   |
|                                              | Female | –           | –           | –           | –             | –           | 59.1 ± 34.4 | 3.11 ± 1.81   |
| <b>M35</b> (U-m)                             | Male   | –           | –           | –           | –             | –           | 75.7 ± 45.8 | 3.98 ± 2.41   |
|                                              | Female | –           | –           | –           | –             | –           | 120 ± 89    | 6.29 ± 4.70   |
| <i>Metabolites of 20(S)-protopanaxatriol</i> |        |             |             |             |               |             |             |               |
| <b>M4</b> (P/U-m)                            | Male   | 27.8 ± 21.5 | 33.5 ± 11.7 | 18.8 ± 6.2  | 599 ± 466     | 54.4 ± 24.8 | 39.2 ± 34.4 | 0.058 ± 0.014 |
|                                              | Female | 33.1 ± 8.6  | 26.8 ± 9.7  | 9.00 ± 2.00 | 701 ± 311     | 37.8 ± 21.3 | 53.1 ± 44.2 | 0.067 ± 0.036 |
| <b>M5</b> (P/U-m)                            | Male   | 31.0 ± 27.2 | 33.5 ± 11.7 | 18.8 ± 6.2  | 635 ± 561     | 38.4 ± 6.4  | 319 ± 278   | 0.504 ± 0.093 |
|                                              | Female | 36.9 ± 10.8 | 26.8 ± 9.7  | 10.8 ± 3.4  | 716 ± 335     | 33.9 ± 15.3 | 292 ± 232   | 0.368 ± 0.166 |
| <b>M6</b> (P/U-m)                            | Male   | 10.1 ± 6.9  | 29.0 ± 6.6  | 18.8 ± 6.2  | 213 ± 142     | 40.9 ± 11.1 | 275 ± 180   | 1.31 ± 0.23   |
|                                              | Female | 8.31 ± 4.05 | 23.3 ± 6.2  | 12.8 ± 1.5  | 181 ± 116     | 41.2 ± 29.3 | 260 ± 226   | 1.21 ± 0.55   |
| <b>M7</b> (P/U-m)                            | Male   | 10.4 ± 8.5  | 31.0 ± 8.1  | 19.5 ± 5.2  | 227 ± 197     | 38.9 ± 4.3  | 107 ± 82    | 0.493 ± 0.082 |
|                                              | Female | 11.1 ± 2.8  | 29.3 ± 13.9 | 14.0 ± 6.9  | 250 ± 113     | 31.7 ± 4.5  | 140 ± 92    | 0.537 ± 0.212 |
| <b>M8</b> (P/U-m)                            | Male   | 300 ± 231   | 33.5 ± 11.7 | 2.88 ± 3.45 | 5969 ± 4618   | 39.6 ± 5.5  | 813 ± 596   | 0.137 ± 0.013 |
|                                              | Female | 340 ± 103   | 26.8 ± 9.7  | 1.75 ± 1.89 | 6704 ± 2460   | 34.1 ± 16.8 | 968 ± 637   | 0.134 ± 0.055 |
| <b>M10</b> (P/U-m)                           | Male   | 59.0 ± 62.2 | 33.5 ± 11.7 | 11.8 ± 2.9  | 1169 ± 1043   | 38.3 ± 5.4  | 24.3 ± 18.1 | 0.026 ± 0.012 |
|                                              | Female | 41.4 ± 17.0 | 26.8 ± 9.7  | 9.00 ± 2.00 | 921 ± 535     | 37.6 ± 18.8 | 20.2 ± 17.3 | 0.021 ± 0.012 |
| <b>M11</b> (P/U-m)                           | Male   | 102 ± 84    | 33.5 ± 11.7 | 15.8 ± 5.7  | 2327 ± 1861   | 46.0 ± 8.8  | 124 ± 104   | 0.051 ± 0.013 |
|                                              | Female | 112 ± 34    | 29.3 ± 13.9 | 8.13 ± 3.07 | 2603 ± 1190   | 42.4 ± 21.2 | 149 ± 112   | 0.053 ± 0.019 |
| <b>M12</b> (P/U-m)                           | Male   | 741 ± 586   | 33.5 ± 11.7 | 0.50 ± 0    | 15127 ± 11927 | 39.6 ± 6.1  | 131 ± 95    | 0.009 ± 0.001 |
|                                              | Female | 809 ± 282   | 26.8 ± 9.7  | 0.50 ± 0    | 16533 ± 7600  | 33.4 ± 13.7 | 180 ± 110   | 0.010 ± 0.003 |
| <b>M13</b> (P/U-m)                           | Male   | 19.9 ± 15.4 | 34.5 ± 7.0  | 19.5 ± 5.2  | 518 ± 396     | 42.3 ± 6.2  | 166 ± 132   | 0.308 ± 0.019 |
|                                              | Female | 23.8 ± 9.1  | 29.3 ± 13.9 | 9.75 ± 3.5  | 578 ± 264     | 34.1 ± 5.8  | 188 ± 133   | 0.306 ± 0.091 |
| <b>M14</b> (P/U-m)                           | Male   | 18.7 ± 15.4 | 34.5 ± 7.0  | 15.8 ± 5.7  | 452 ± 342     | 50.2 ± 14.7 | 22.5 ± 13.1 | 0.062 ± 0.032 |
|                                              | Female | 20.0 ± 7.4  | 31.5 ± 11.4 | 11.8 ± 2.9  | 511 ± 205     | 50.5 ± 23.3 | 28.0 ± 12.5 | 0.056 ± 0.016 |
| <b>M15</b> (P/U-m)                           | Male   | 7.68 ± 6.05 | 32.5 ± 6.8  | 6.25 ± 6.71 | 195 ± 138     | 44.2 ± 7.6  | 12.9 ± 8.7  | 0.067 ± 0.010 |
|                                              | Female | 8.30 ± 3.00 | 29.3 ± 13.9 | 4.38 ± 5.42 | 213 ± 77      | 41.0 ± 16.4 | 15.8 ± 6.4  | 0.072 ± 0.008 |
| <b>M23</b> (U-m)                             | Male   | –           | –           | –           | –             | –           | –           | 8.97 ± 1.38   |
|                                              | Female | –           | –           | –           | –             | –           | 89.3 ± 94.0 | 12.4 ± 10.5   |

## DMD #51391

|                  |        |   |   |   |   |   |           |             |
|------------------|--------|---|---|---|---|---|-----------|-------------|
| <b>M24</b> (U-m) | Male   | – | – | – | – | – | 311 ± 237 | 14.7 ± 2.3  |
|                  | Female | – | – | – | – | – | 369 ± 307 | 11.0 ± 4.9  |
| <b>M25</b> (U-m) | Male   | – | – | – | – | – | 117 ± 97  | 8.69 ± 1.77 |
|                  | Female | – | – | – | – | – | 131 ± 120 | 12.5 ± 4.8  |
| <b>M27</b> (U-m) | Male   | – | – | – | – | – | 284 ± 213 | 36.4 ± 29.9 |
|                  | Female | – | – | – | – | – | 326 ± 344 | 15.2 ± 8.4  |
| <b>M29</b> (U-m) | Male   | – | – | – | – | – | 163 ± 137 | 6.69 ± 0.93 |
|                  | Female | – | – | – | – | – | 200 ± 162 | 6.30 ± 3.17 |

$C_{\max}$ : maximum plasma concentration;  $T_{\max}$ : time taken to achieve the maximum concentration;  $T_L$ : lag time for occurrence in plasma;  $AUC_{0 \rightarrow t}$ : area under concentration-time curve up to the last measured time point; MRT: mean residence time;  $Cum.A_{e0 \rightarrow 72h}$ : cumulative amount excreted in the urine during sampling period;  $CL_R$ : renal clearance.

\*P/U-g, plasma/urinary ginsenoside; P/U-m, plasma/urinary metabolite; P-m, plasma metabolite; U-m, urinary metabolite.
